# Supplementary material
Source: PubMed Central journal article supplement (PMC8384084)
Supplement: NIHMS1728489-supplement-Supplementary_material.pdf [file NIHMS1728489-supplement-Supplementary_material.pdf]

## Supplemental Figure 1

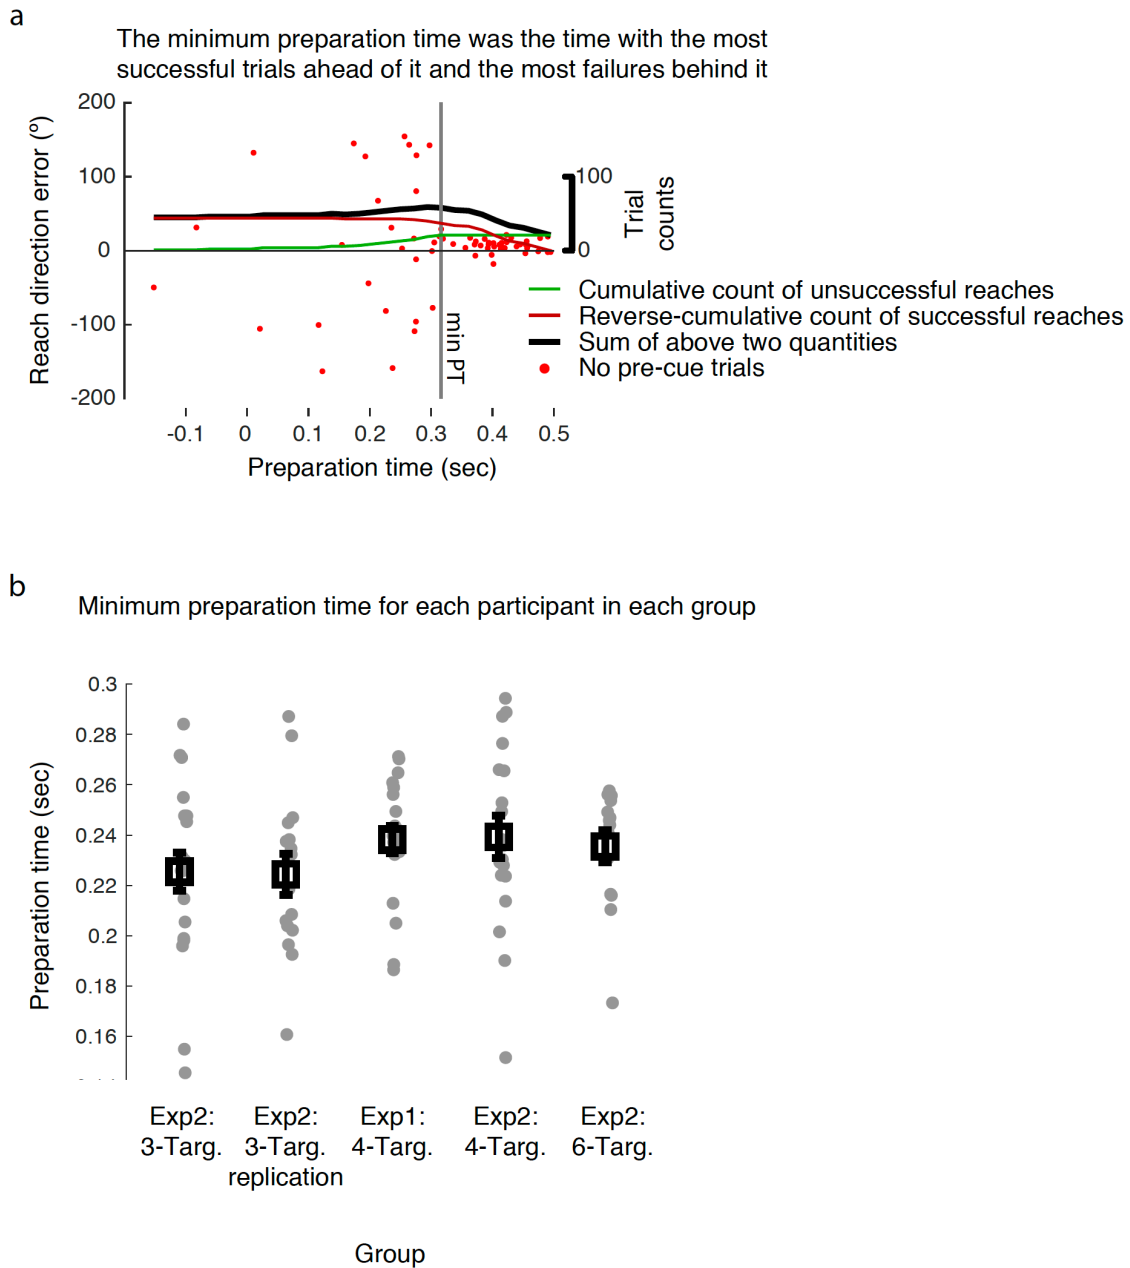

Supplemental Figure 1: Calculating an individual's minimum PT. (a) The cumulative sum of non-correct trials and the reverse-cumulative sum of correct trials were summed to get a function that peaked near the minimum PT. Given the lack of resolution of trials precisely at the minimum PT for many participants, the minimum PT was taken as the latest time at which this function was within 95% of its maximum. (b) The distribution of computed min PT across each group in Experiments 1 and 2. Grey dots indicate individual participants, black squares indicate the mean within a group, and error bars represent the standard error about the mean.
